# Supplementary material for: Indium oxide nanocluster doped TiO2 catalyst for activation of molecular O2
Source: Royal Society of Chemistry journal article supplement (doi:10.1039/c5ra13104a), 2015-01-01
Supplement: c5ra13104a1.pdf [file c5ra13104a1.pdf]

## Supporting Information

### Indium oxide nanocluster doped TiO<sub>2</sub> catalyst for activation of molecular O<sub>2</sub>

Vipin Amoli,<sup>a</sup> Saleem Farooqui,<sup>a</sup> Aditya Rai,<sup>a</sup> Chiranjit Santra,<sup>b</sup> Sumbul Rahman,<sup>b</sup> Anil Kumar Sinha<sup>\*a</sup> and Biswajit Chowdhury<sup>\*b</sup>

<sup>a</sup> CSIR-Indian Institute of Petroleum, Dehradun 248005, India

<sup>b</sup> Indian School of Mines, Department of Applied Chemistry, Dhanbad 826004, India

#### Materials and Reagents

Titanium (IV) isopropoxide [Ti{OCH(CH<sub>3</sub>)<sub>2</sub>}<sub>4</sub>, 95% Alfa aesar], Indium (III) chloride (InCl<sub>3</sub>, anhydrous 99.99% Alfa Aesar), ethanol (Merck, anhydrous) and nitric acid (70% Merck) were used during synthesis. Titania nanoparticles (P-25, Aldrich) and Indium oxide nanoparticles (SRL, average particle size 50 nm) were used to r control experiments.

#### Synthesis of indium oxide nanoclusters doped TiO<sub>2</sub> (In<sub>2</sub>O<sub>3</sub>/TiO<sub>2</sub>) nanostructures

In a typical optimized experimental procedure, 0.5 g of InCl<sub>3</sub> was added to 5 mL of ethanol and was stirred for 10 minutes at ambient conditions. To this 12.5 mL solution Titanium isopropoxide was added drop-wise under continuous stirring. After that 50 mL of 0.1 M HNO<sub>3</sub> is added to the reaction mixture. Then the temperature was raised to 80 °C and the suspension was heated for 2 h with continuous stirring in a closed vessel. Afterwords the mixture was transferred to an autoclave and kept in a furnace at 150 °C temperature for 24 h duration for crystallization under hydrothermal condition. After the hydrothermal treatment, autoclave was allowed to cool at room temperature and product was collected by vacuum filtration. Te residue was washed several times with distilled water, and finally dried at 80 °C for 12 h. The

$\text{In}_2\text{O}_3/\text{TiO}_2\{101\}$  and  $\text{In}_2\text{O}_3/\text{TiO}_2\{001\}$  nanostructures were obtained by calcination of dry powder at 450 °C (10 °C min<sup>-1</sup>) and 550 °C (10 °C min<sup>-1</sup>) temperature for 2.5 h respectively. The  $\text{In}_2\text{O}_3/\text{TiO}_2\{101\}$  refers to the sample with exposed {101} planes and  $\text{In}_2\text{O}_3/\text{TiO}_2\{001\}$  refers to samples with some exposed {001} planes (in addition to predominant {101} plane).

### **Theoretical calculation method**

All the calculations were performed using the Forcite anneal module in Materials Studio 7.0 molecular modeling software package (Accelrys). The Forcite anneal module is an advanced classical molecular mechanics calculation tool that can obtain geometry optimizations, energy calculations, and dynamic simulations reliably for a wide range of molecular and periodic systems. The geometry optimization process was carried out by using an iterative process, in which the atomic coordinates were adjusted until the total energy of a structure was minimized. Geometry optimization was based on reducing the magnitude of the calculated forces until they became smaller than defined convergence tolerances. Anneal model was specifically used to find the global minimum energy structures for molecules/surfaces under consideration, to carry out energy calculations. The temperature range used for annealing was 300K-500K. Anatase  $\text{TiO}_2$  surface was cleaved to obtain  $\text{TiO}_2$  {101} and  $\text{TiO}_2$  {001} surfaces. After surface cleaving, some of the titania were capped with hydroxyl group arbitrarily. Periodicity of the structures was changed by constructing a super cell, and then vacuum slab of thickness 20 Å on  $\text{TiO}_2$  {101} and  $\text{TiO}_2$  {001} surfaces to eliminate the interaction between the neighbouring cells. Indium oxide unit cell ( $\text{In}_2\text{O}_3$ ) was used as input component to construct Indium oxide nanocluster (1 nm) using build command. The structure was stabilized using Forcite anneal in the same temperature range (300K-500K), with universal forcefield component. Geometry optimised structures and corresponding energy minimised values for various structures such as indium oxide nanoclusters,

oxygen molecule, TiO<sub>2</sub> surfaces ({001} and {101}) and all feed components used for calculations are given in Table S1. Adsorption locator module was used to find the specific location of In<sub>2</sub>O<sub>3</sub> nanoparticle, its adsorption energy, and density field across TiO<sub>2</sub> {001} and {101} surfaces. Adsorption Locator identifies possible adsorption configurations by carrying out Monte Carlo searches of the configurational space of the substrate-adsorbate system as the temperature is slowly decreased. In both approaches (Forcite anneal and Adsorption Locator) the final temperature was taken 150°C (423K), in accordance with the experimental reaction temperature. Similar approach was used to find the adsorption characteristics of feed (Styrene: Oxygen 1:20) and product (Styrene epoxide and benzaldehyde) on both surfaces (In<sub>2</sub>O<sub>3</sub> doped TiO<sub>2</sub> {001} and In<sub>2</sub>O<sub>3</sub> doped {101} surfaces). Adsorption energy and isosteric heat of adsorption for individual component was also calculated.

### **Measurement and Characterization**

X-ray diffraction (XRD) patterns of the samples were recorded on Bruker D8 Advance Diffractometer operating in the reflection mode with Cu-K $\alpha$  radiation (40 KV, 40 mA). Field Emission Gun Transmission Electron Microscope JEOL-TEM-2010, operating at 200 kV was used for high-resolution transmission electron microscope (HRTEM) images. X-ray photoelectron spectroscopy was performed on Axis-Ultra DLD, Shimadzu Instrument equipped with an Mg K $\alpha$  X-ray exciting source with 30 mA current, 15 kV voltage, and 80 eV pass energy. The energy scale was calibrated using Au. The Brunauer-Emmett-Teller (BET) specific surface areas were obtained from the N<sub>2</sub> adsorption/desorption isotherms recorded on BELSORP max (Japan) at -196 °C. The samples were degassed and dried under a vacuum system at 150 °C for 2-3 h prior to the measurement.

## Catalytic activity measurement

The reaction mixture was prepared by using 10 mL DMF (99.8 %, Merck, India), 6.5 mmol styrene (99 %, Acros Organics) and 0.1 mL dodecane (99 %, Acros Organics) as an internal standard. The reaction mixture was shaken vigorously for homogenization and 0.1 g catalyst was added to it. Now the prepared reaction mixture along with catalyst was kept in a batch reactor where 50 mL two necked round bottom flask was fitted with a water condenser maintained at a constant temperature (150 °C). Thereafter oxygen (99.99 % purity) was bubbled into the mixture at the flow rate of 10 mL/min (flow is maintained by Aalborg mass flow controller; USA) with continuous stirring (700 rpm) condition. The reaction mixture was analyzed by GC-1000 (Chemito-India) equipped with SE-30 column and FID detector. The TOF was calculated on the basis of moles of styrene converted/mol of indium present in the catalyst per hour. The Conversion profile for predicted reaction order was verified using COMSOL multiphysics software.

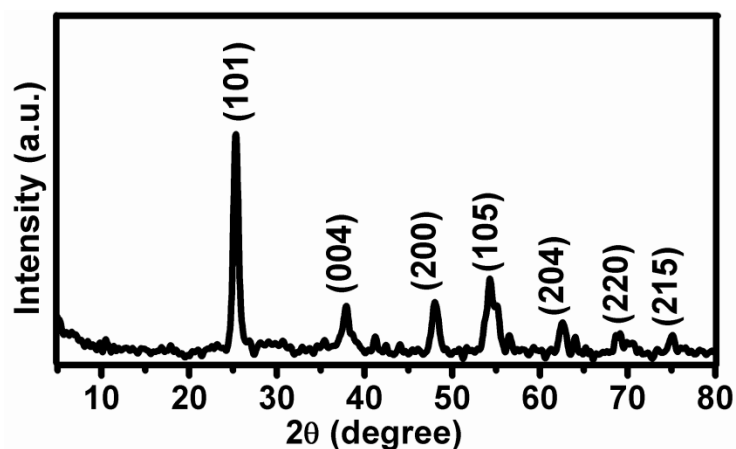

**Fig. S1:** XRD pattern of 1% In<sub>2</sub>O<sub>3</sub>/TiO<sub>2</sub> calcined at 550°C temperature

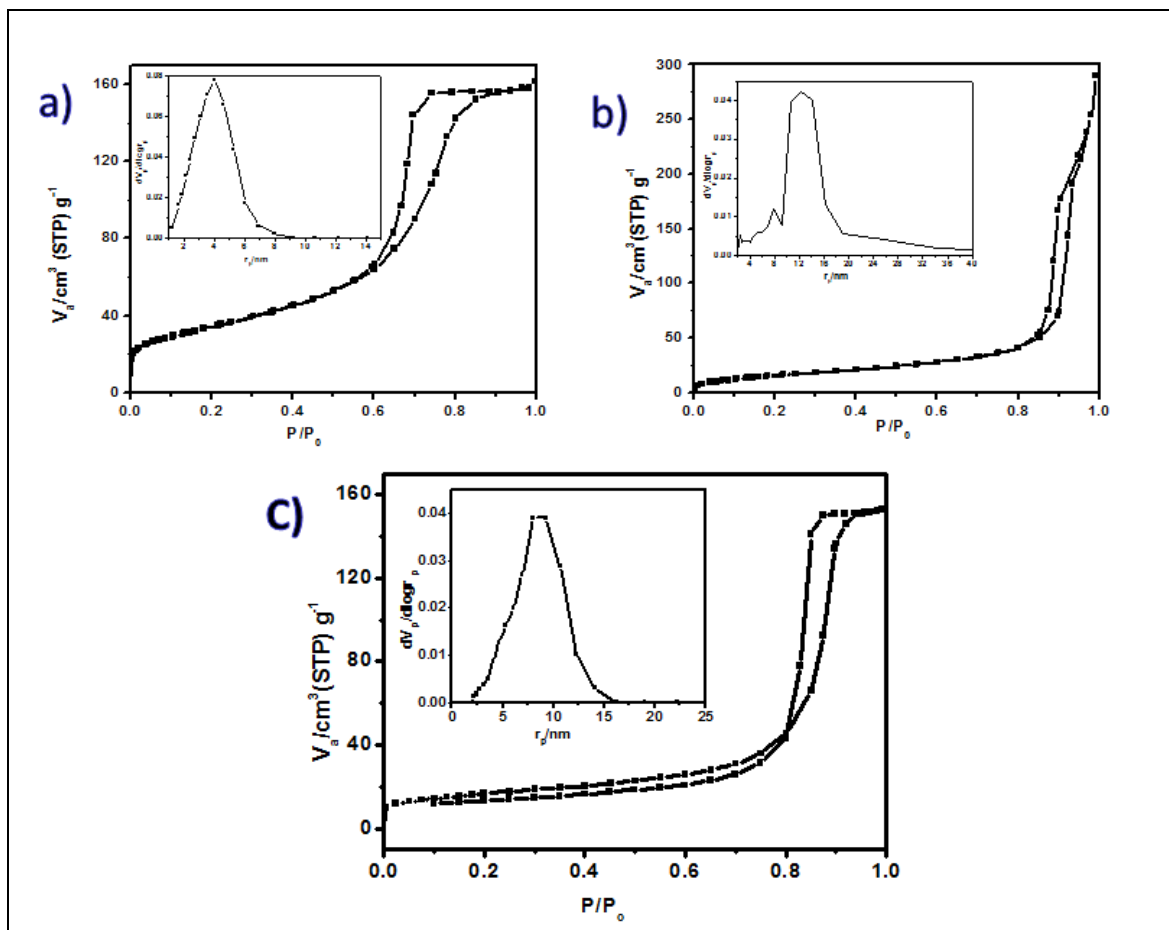

**Fig. S2** N<sub>2</sub> Physisorption results of a) 1 at% In/TiO<sub>2</sub> calcined at 450 °C b) 1 at% In/TiO<sub>2</sub> calcined at 550 °C c) 2 at% In/TiO<sub>2</sub> calcined at 550 °C

### The complete computational details:

**Table S1** Global minimum energy structures and energy details of input structures used for oxygen and styrene activity calculations.

| Structure                                          | Method used    | Final Energy of the structure kcal/mol | Final stable Structure                                                                |
|----------------------------------------------------|----------------|----------------------------------------|---------------------------------------------------------------------------------------|
| In <sub>2</sub> O <sub>3</sub> nanoparticle (1 nm) | Forcite anneal | 5126.487                               | 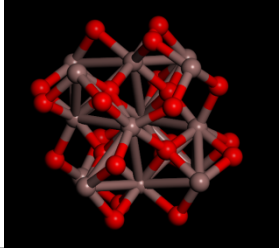   |
| Oxygen molecule                                    | Forcite anneal | 3.837                                  |    |
| Styrene                                            | Forcite anneal | 46.118                                 |   |
| Benzaldehyde                                       | Forcite anneal | 38.101                                 |  |
| Styrene oxide                                      | Forcite anneal | 385.674                                |  |

|                                            |                       |                                                                                                             |                                                                                     |
|--------------------------------------------|-----------------------|-------------------------------------------------------------------------------------------------------------|-------------------------------------------------------------------------------------|
| <b>TiO<sub>2</sub> anatase 101 surface</b> | <b>Forcite anneal</b> | <b>Total enthalpy</b><br><b>:8728.478 kcal/mol</b><br><br><b>Total energy</b><br><b>:12130.745 kcal/mol</b> | 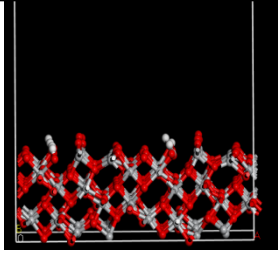 |
| <b>TiO<sub>2</sub> anatase 001 surface</b> | <b>Forcite anneal</b> | <b>Total enthalpy</b><br><b>:12418.063 kcal/mol</b><br><br><b>Total energy</b><br><b>13677.986 kcal/mol</b> |  |

**Table S2** Calculation of adsorption energy of final structures after indium oxide adsorbed on different TiO<sub>2</sub> surfaces.

| Structure                                                                                  | Method used                                                                                                          | Final Energy of the structure<br>kcal/mol | Final stable Structure                                                                |
|--------------------------------------------------------------------------------------------|----------------------------------------------------------------------------------------------------------------------|-------------------------------------------|---------------------------------------------------------------------------------------|
| In <sub>2</sub> O <sub>3</sub> nanoparticle (1 nm) on TiO <sub>2</sub> anatase 101 surface | Adsorption locator calculation,<br>Task : simulated annealing<br>Forcefield: universal<br>Electrostatic: Group based | 5079.103                                  | 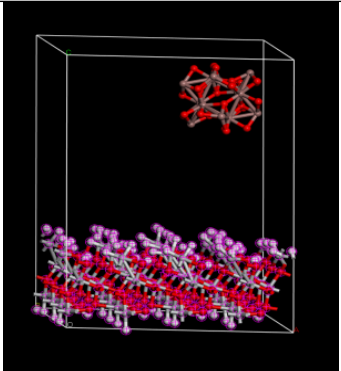 |
| In <sub>2</sub> O <sub>3</sub> nanoparticle (1 nm) on TiO <sub>2</sub> anatase 001 surface | Adsorption locator calculation,<br>Task : simulated annealing<br>Forcefield: universal<br>Electrostatic: Group based | 5087.164                                  |  |

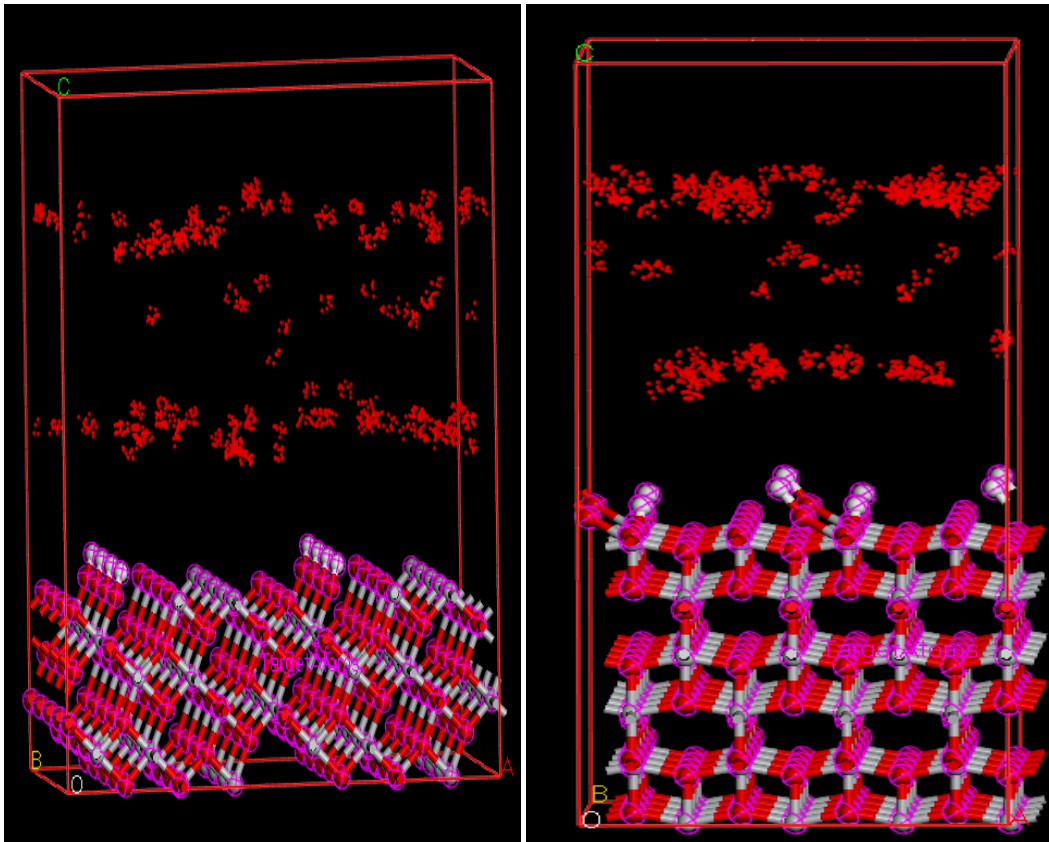

**Fig. S3**  $\text{In}_2\text{O}_3$  nanoparticle (1 nm) Fields on  $\text{TiO}_2$  anatase 101 surface and 001 surface.

A. Formula used to calculate Binding energy for  $\text{In}_2\text{O}_3$ :

$$E(\text{In}_2\text{O}_3\text{-TiO}_2(101 \text{ or } 001)) - E(\text{In}_2\text{O}_3) - E(\text{TiO}_2(101 \text{ or } 001) \text{ surface})$$

B. Formula used to calculate Binding energy for feed (styrene and oxygen):

$$E \text{ final structure} - (20 * E_{\text{O}_2} + E_{\text{styrene}} + E_{\text{In}_2\text{O}_3\text{-TiO}_2(101 \text{ or } 001)})$$

C. Formula used to calculate Binding energy for products ((styrene and oxygen):

$$E \text{ final structure} - (E_{\text{O}_2} + E_{\text{styrene}} + E_{\text{In}_2\text{O}_3\text{-TiO}_2(101 \text{ or } 001)})$$



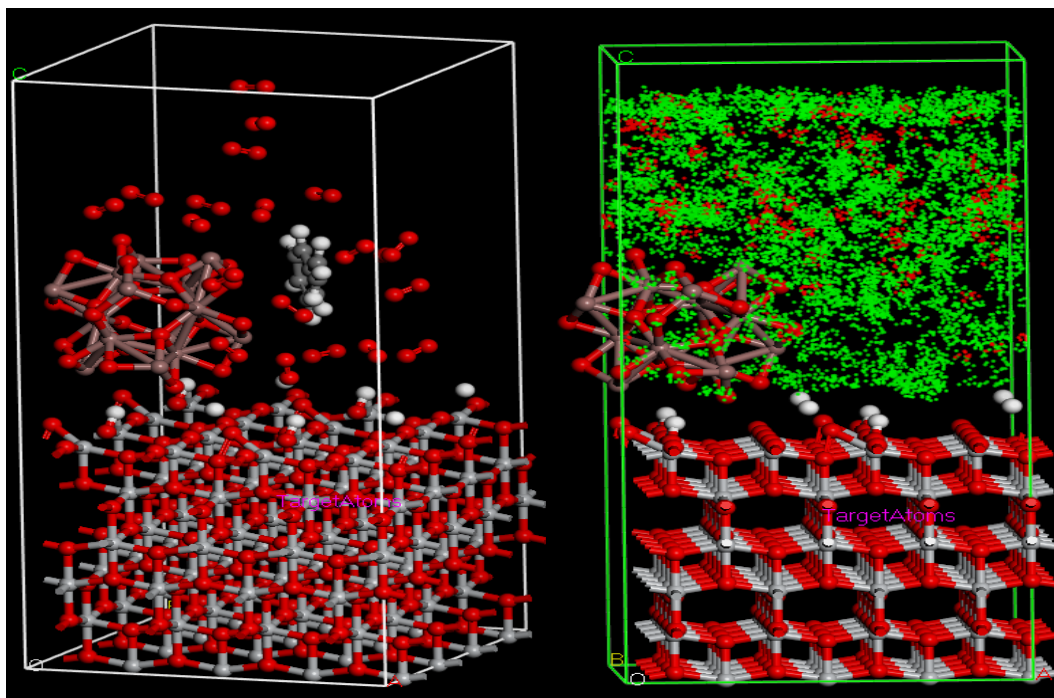

**Fig. S4** (a) Geometry optimized structure showing adsorption of Styrene and oxygen (1 molecule styrene and 20 molecules O<sub>2</sub>, the ratio selected for computational studies is in accordance with experimental conditions used in our work) on In<sub>2</sub>O<sub>3</sub>-TiO<sub>2</sub> 101 surface (b) field density distribution; (Green=oxygen density, red=styrene density).

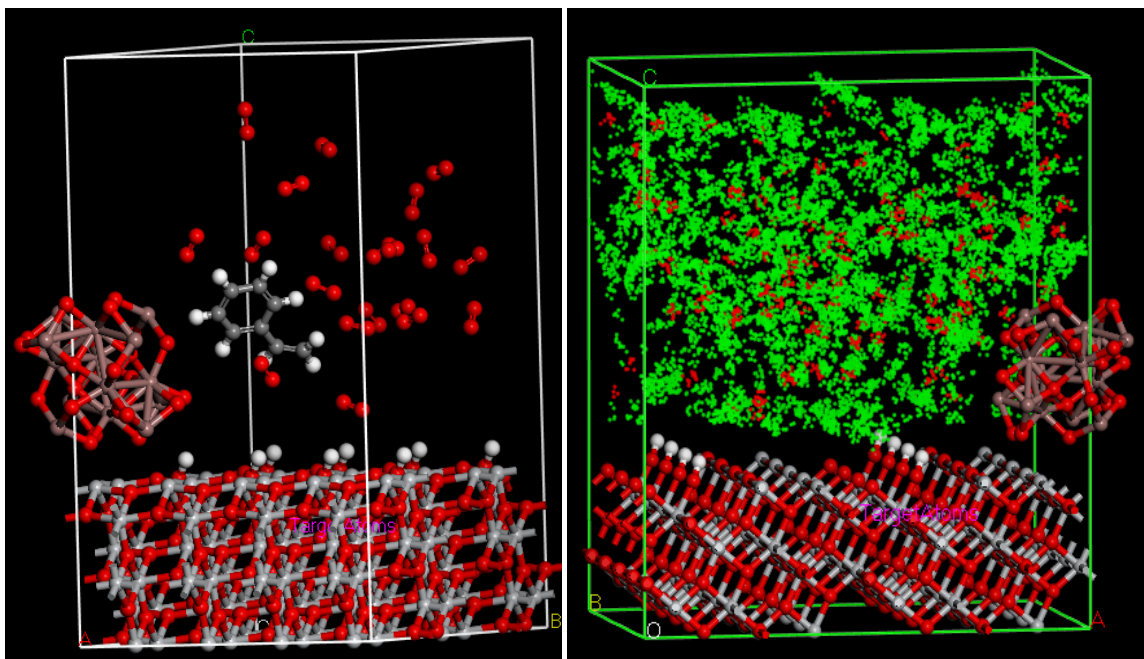

**Fig. S5** (a) Geometry optimized structure showing adsorption of Styrene and oxygen (1 molecule styrene and 20 molecules O<sub>2</sub>, the ratio selected for computational studies is in accordance with experimental conditions used in our work) on In<sub>2</sub>O<sub>3</sub>-TiO<sub>2</sub> 001 surface (b) field density distribution; (Green=oxygen density, red=styrene density).

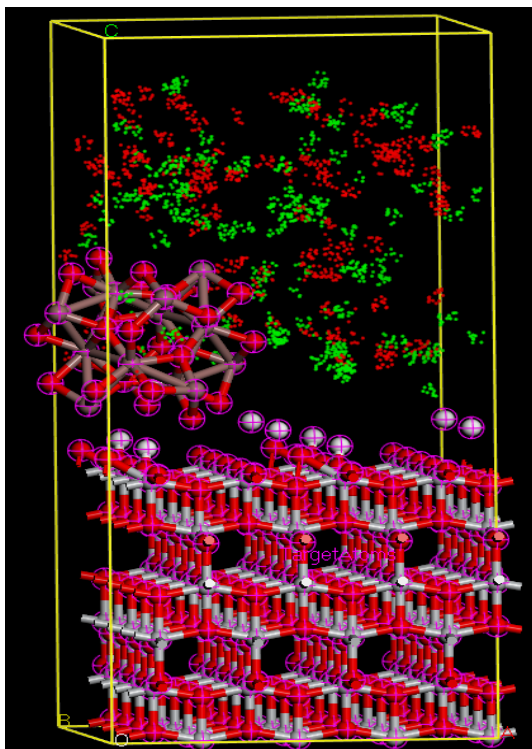

**Fig. S6** Benzaldehyde and styrene epoxide (products) adsorption on In<sub>2</sub>O<sub>3</sub>-TiO<sub>2</sub> 001 surface (catalyst); final structure and filed (Red= Styrene epoxide density, Green= benzaldehyde density).

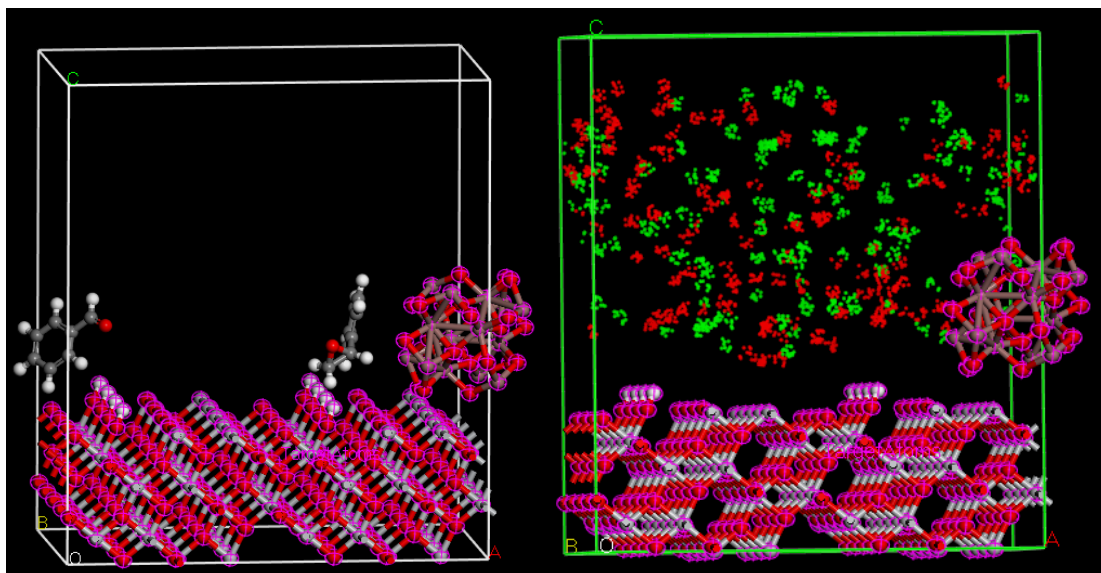

**Fig. S7** Benzaldehyde and styrene epoxide (products) adsorption on In<sub>2</sub>O<sub>3</sub>-TiO<sub>2</sub> 101 surface (catalyst); final structure and filed (Red= benzaldehyde density, Green= Styrene epoxide density).

**Table S3** Isothermic heat and Energy for Adsorption of feed and products on two surfaces of In<sub>2</sub>O<sub>3</sub>-TiO<sub>2</sub> (001) and (101) phases

|                                                                       | In <sub>2</sub> O <sub>3</sub> -TiO <sub>2</sub> (101) surface |                                  | In <sub>2</sub> O <sub>3</sub> -TiO <sub>2</sub> (001) surface |                                  |
|-----------------------------------------------------------------------|----------------------------------------------------------------|----------------------------------|----------------------------------------------------------------|----------------------------------|
| Isothermic heat and Energy for Adsorption of feed on two surfaces     |                                                                |                                  |                                                                |                                  |
|                                                                       | Isothermic heats<br>kCal/mol                                   | Average total<br>energy kcal/mol | Isothermic heats<br>kCal/mol                                   | Average total<br>energy kcal/mol |
| Oxygen                                                                | 6.512                                                          | 91.213                           | 7.078                                                          | 83.047                           |
| Styrene                                                               | 20.779                                                         |                                  | 24.306                                                         |                                  |
| Isothermic heat and Energy for Adsorption of products on two surfaces |                                                                |                                  |                                                                |                                  |
|                                                                       | Isothermic heats<br>kCal/mol                                   | Average total<br>energy kcal/mol | Isothermic heats<br>kCal/mol                                   | Average total<br>energy kcal/mol |
| benzaldehyde                                                          | 20.333                                                         | 394.011                          | 23.614                                                         | 390.438                          |
| styrene oxide                                                         | 34.372                                                         |                                  | 36.950                                                         |                                  |

**Table S4** Order and rate constant determination (over catalyst calcined at 450°C)

| Order (n) | A                                | Rate constant, k hr <sup>-1</sup> | R <sup>2</sup> |
|-----------|----------------------------------|-----------------------------------|----------------|
| 0         | $(N_{styrene0} - N_{styrene})$   | 0.188                             | 0.908          |
| 1         | $\ln(N_{styrene0}/N_{styrene})$  | 0.032                             | 0.876          |
| 2         | $1/(N_{styrene0} - N_{styrene})$ | 0.005                             | 0.838          |

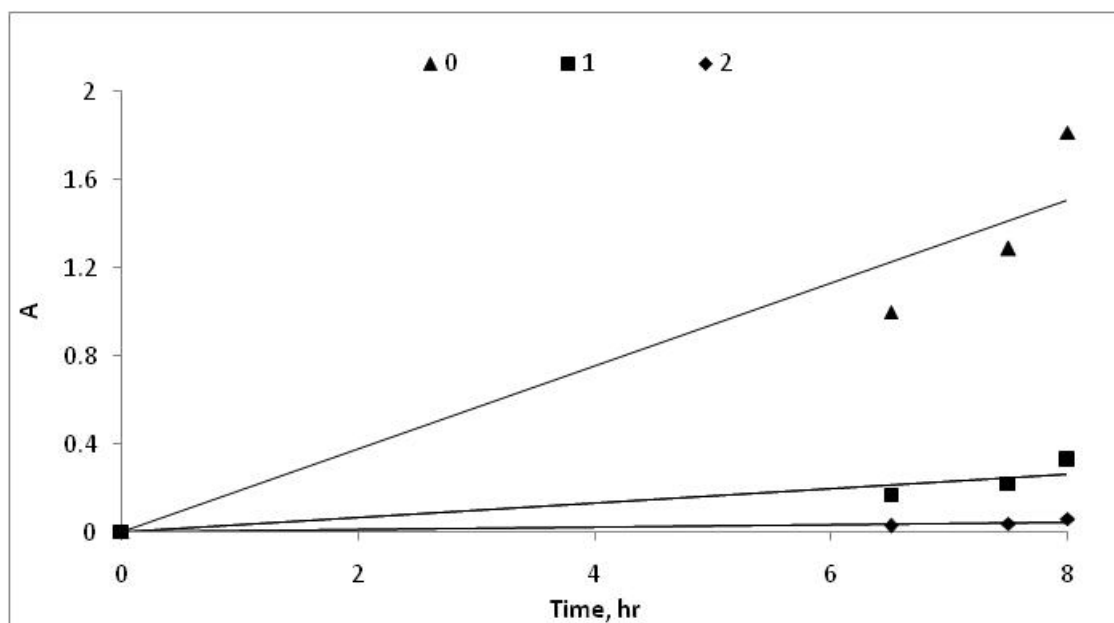

**Fig. S8** Plot of A vs. Time (h) for styrene oxidation reaction in a batch reactor for styrene oxidation in a batch reactor at 150 °C (over catalyst calcined at 450 °C)

Table S5 Order and rate constant determination (over catalyst calcined at 550 °C)

| Order (n) | A                                | Rate constant, k hr <sup>-1</sup> | R <sup>2</sup> |
|-----------|----------------------------------|-----------------------------------|----------------|
| 0         | $(N_{styrene0} - N_{styrene})$   | 0.366                             | 0.920          |
| 1         | $\ln(N_{styrene0}/N_{styrene})$  | 0.073                             | 0.835          |
| 2         | $1/(N_{styrene0} - N_{styrene})$ | 0.015                             | 0.728          |

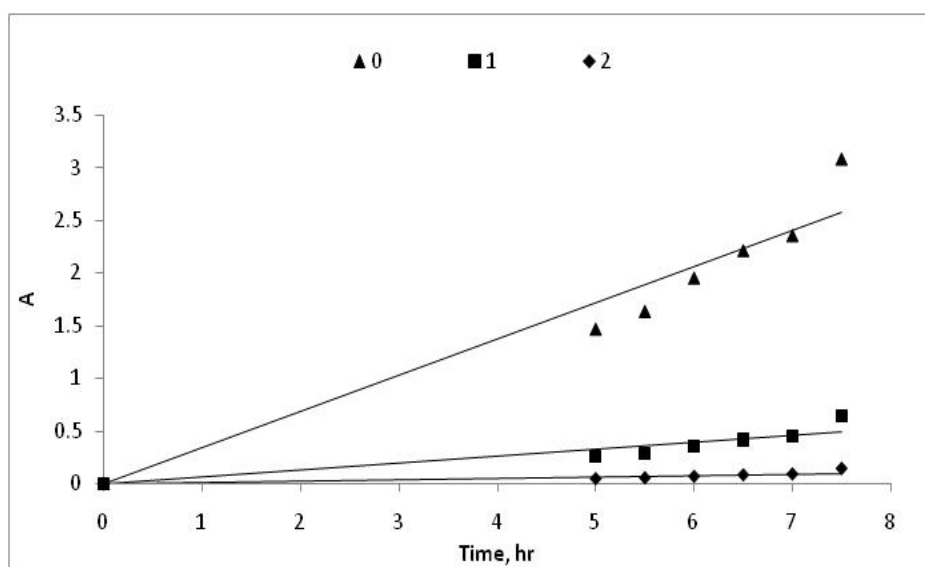

**Fig. S9** Plot of A vs. Time (h) for styrene oxidation reaction in a batch reactor for styrene oxidation in a batch reactor at 150 °C (over catalyst calcined at 550 °C)

**Fig. S10** EDX results of 1% In<sub>2</sub>O<sub>3</sub>/TiO<sub>2</sub>

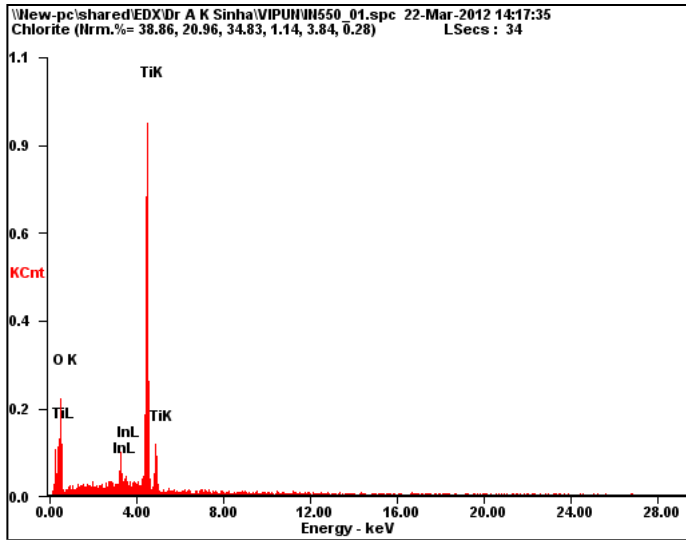

| <i>Element</i> | <i>Wt %</i> | <i>At %</i> |
|----------------|-------------|-------------|
| <i>O K</i>     | 57.11       | 81.14       |
| <i>In L</i>    | 05.41       | 01.07       |
| <i>Ti K</i>    | 37.48       | 17.78       |

EDAX ZAF QUANTIFICATION STANDARDLESS SEC TABLE :  
DFFAULT
